# Supplementary material for: Changes in the Sodium Content in Branded Foods in the Slovenian Food Supply (2011–2020)
Source: MDPI journal article supplement (doi:10.3390/nu15194304), 2023-10-09
Supplement: s1 [file s1]

*Supplementary Materials*

## **Changes in the Sodium Content in Branded Foods in the Slovenian Food Supply (2011–2020)**

Sanja Krušič <sup>1</sup>, Hristo Hristov <sup>1</sup>, Maša Hribar <sup>1</sup>, Živa Lavriša <sup>1</sup>, Katja Žmitek <sup>1,2</sup> and Igor Pravst <sup>1,2,3,\*</sup>

**Table S1.** Examples of foods included in the investigated (sub)categories.

| <b>Food categories</b>            | <b>Examples of included foods</b>                                                                                                 |
|-----------------------------------|-----------------------------------------------------------------------------------------------------------------------------------|
| Bread                             | Plain bread, crispy bread, tortillas, dough                                                                                       |
| - Plain bread                     | Wheat bread, baguette, bread crumbs, toast, mix grain breads, small bread products, corn mixed bread, rye mixed bread, etc.       |
| Biscuits                          | Sweetened pastries and biscuits, brioche, butter biscuits, wafers, cookies, ...                                                   |
| Cakes, muffins, and pastry        | croissants, croissants with filling, cakes, muffins, etc.                                                                         |
| Breakfast cereals                 | Corn flakes, sweet flakes, cokolino, sport muesli, wholemeal, rolled cereals/oat flakes, puffed rice, other cereals               |
| Pasta                             | pasta, noodles, whole grain pasta, etc.                                                                                           |
| - Noodles                         | noodles                                                                                                                           |
| - Dry pasta                       | All kinds of dry pasta                                                                                                            |
| Pizza                             | Pizza                                                                                                                             |
| Soup (prepared)                   | Soup concentrates, canned soups, etc.                                                                                             |
| Ready meals                       | Prepared dishes, lasagna paella, nuggets, pasta dishes, etc.                                                                      |
| Preprepared salads and sandwiches | Salads, sandwiches, sushi, fish salads, potato salads, french salads; stuffed baguettes, garlic or butter bread, tortillas (wrap) |
| Cheese and imitates               | All kinds of soft and hard cheese, cheese spreads, cheese imitates, etc.                                                          |
| - Cheese                          | All kinds of soft and hard cheese, curd, cottage cheese                                                                           |
| - Spreads and processed cheese    | Cheese spreads and processed cheese                                                                                               |
| - Cheese imitates                 | Cheese-like vegetable products                                                                                                    |
| Butter and margarine              | Butter and margarine                                                                                                              |
| Canned vegetables                 | Canned beets, peas, beans, corn, etc.                                                                                             |
| Processed meat and derivatives    | Salamis, pate, frankfurters, sausages, etc.                                                                                       |
| Meat alternatives                 | Meat-like vegetable products                                                                                                      |
| Crisps and snacks                 | Savoury snacks, chips, etc.                                                                                                       |
| Sauces                            | Pasta sauces, sweet and savoury sauces                                                                                            |
| - Pasta sauces                    | Bolognese sauce, pesto sauce, cream sauce, etc.                                                                                   |
| Mayonnaise/dressings              | Mayonnaise, salad dressings, etc.                                                                                                 |
| Spreads                           | Chocolate spreads, peanut butter, vegetable spreads, hummus, etc.                                                                 |
| - Vegetable spreads               | Hummus, soy spreads, vegetable spreads, etc.                                                                                      |
| Water                             | Bottled water (with or without gas)                                                                                               |

**Table S2.** Sodium content in prepacked foods for selected food (sub)categories in 2017 and 2020.

| Food (sub)category                 | 2020 |                        |                             | 2017 |                        |                             | SCA Mean<br>diff.(SE) 2020/2017 | SSC Ratio<br>2020/2017 (%) |
|------------------------------------|------|------------------------|-----------------------------|------|------------------------|-----------------------------|---------------------------------|----------------------------|
|                                    | N    | Sodium content         | SAR<br>MSC/SSC<br>Ratio (%) | N    | Sodium content         | SAR<br>MSC/SSC<br>Ratio (%) |                                 |                            |
|                                    |      | (mg per 100g/mL)       |                             |      | (mg per 100g/mL)       |                             |                                 |                            |
|                                    |      | Mean [MSC]<br>(95% CI) |                             |      | Mean [MSC]<br>(95% CI) |                             |                                 |                            |
| Bread                              | 413  | 566 (347;784)          | 89                          | 361  | 559 (349;769)          | 93                          | −7 (15.4)                       | 97                         |
| - Plain bread                      | 169  | 483 (380;587)          | 101                         | 134  | 489 (315;663)          | 100                         | 6 (16.1)                        | 100                        |
| Biscuits                           | 770  | 169 (−9;347)           | 108                         | 707  | 186 (35;337)           | 88                          | 17 (8.6)*                       | 112                        |
| Cakes, muffins and pastry          | 376  | 221 (55;387)           | 87                          | 344  | 207 (51;363)           | 103                         | −14 (12.0)                      | 90                         |
| Breakfast cereals                  | 418  | 157 (−66;380)          | 123                         | 320  | 191 (−59;441)          | 114                         | 34 (17.5)*                      | 89                         |
| Pasta                              | 744  | 133 (−154;420)         | 93                          | 633  | 144 (−168;456)         | 89                          | 11 (16.2)                       | 96                         |
| - Noodles                          | 62   | 257(−76;590)           | 144                         | 87   | 317 (−235;869)         | 83                          | 60 (78.7)                       | 141                        |
| - Dry pasta                        | 569  | 76 (−194;346)          | 40                          | 445  | 55 (−152;262)          | 56                          | −21 (15.5)                      | 96                         |
| Pizza                              | 25   | 520 (417;623)          | 95                          | 26   | 564 (386;743)          | 93                          | 44 (40.9)                       | 94                         |
| Soup (prepared)                    | 197  | 352 (272;432)          | 105                         | 206  | 375 (293; 457)         | 101                         | 23 (8.0)*                       | 97                         |
| Ready meals                        | 212  | 536 (−133;1205)        | 82                          | 187  | 428 (291; 565)         | 103                         | −108 (49.8)×                    | 100                        |
| Pre-prepared salads and sandwiches | 85   | 507 (269;745)          | 101                         | 39   | 464 (322; 606)         | 114                         | −43 (41.2)                      | 96                         |
| Cheese and imitates                | 523  | 603 (29;1177)          | 72                          | 475  | 576 (217; 936)         | 65                          | −27 (30.7)                      | 116                        |
| - Cheese                           | 302  | 680 (3;1356)           | 88                          | 266  | 637 (300; 975)         | 89                          | −43 (45.8)                      | 105                        |
| - Spreads and processed cheese     | 135  | 584 (269;899)          | 98                          | 155  | 605 (270; 939)         | 91                          | 21 (38.3)                       | 103                        |
| - Cheese imitates <sup>a</sup>     | 33   | 789 (518;1059)         | 116                         | 3    | 1027 (980; 1073)       | 100                         | 238 (158.4)                     | NA                         |
| Butter and margarine               | 91   | 178 (−94;451)          | 36                          | 92   | 144 (−74; 363)         | 54                          | −34 (36.5)                      | 84                         |
| - Canned vegetable                 | 497  | 623 (−401;1647)        | 60                          | 515  | 740 (−488; 1967)       | 55                          | 117 (71.2)*                     | 92                         |
| Processed meat and derivatives     | 732  | 1073                   | 74                          | 703  | 895 (391; 1398)        | 87                          | −178 (96.6)×                    | 102                        |
| Meat alternatives                  | 122  | 500 (145;854)          | 65                          | 90   | 438 (68; 808)          | 81                          | −62 (50.2)                      | 92                         |
| Crisps and snacks                  | 432  | 754 (384;1124)         | 107                         | 340  | 815 (424; 1206)        | 99                          | 61 (27.5)*                      | 99                         |
| Sauces                             | 686  | 1280 (−397;2957)       | 60                          | 581  | 1381 (−453;3214)       | 61                          | 101(98.7)                       | 91                         |
| - Pasta sauces                     | 131  | 721 (132;1309)         | 75                          | 149  | 851 (−296; 1999)       | 87                          | 130 (111.3)                     | 73                         |
| Mayonnaise/dressings               | 76   | 545 (346;744)          | 86                          | 70   | 557 (352; 762)         | 84                          | 12 (33.5)                       | 100                        |
| Spreads                            | 265  | 292 (−100;684)         | 49                          | 174  | 345 (9; 682)           | 42                          | 53 (36.2)                       | 99                         |
| - Vegetable spreads                | 104  | 452 (233;671)          | 103                         | 60   | 593 (289; 896)         | 91                          | 141 (41.0)*                     | 86                         |
| Waters                             | 95   | 16 (−21;53)            | 357                         | 99   | 14 (−25; 52)           | 267                         | −2 (5.4)                        | 160                        |

Notes: MSC: Mean sodium content of available prepacked foods (95% confidence interval); SCS: Sale-weighted sodium content in prepacked foods (data in Table1); SAR: Ratio between MSC and SCS; <sup>a</sup> category for which statistical analysis was not conducted, due to small sample size; \* Significant decrease in MSC (P < 0.05). <sup>x</sup> Significant increase in MSC (P < 0.05).
